# Supplementary material
Source: MDPI journal article supplement (https://www.mdpi.com/2072-4292/8/2/162)
Supplement: s1 [file s1]

Supplementary Materials: Comparing and Combining Remotely Sensed Land Surface Temperature Products for Improved Hydrological Applications

Robert M. Parinussa, Venkat Lakshmi, Fiona Johnson and Ashish Sharma


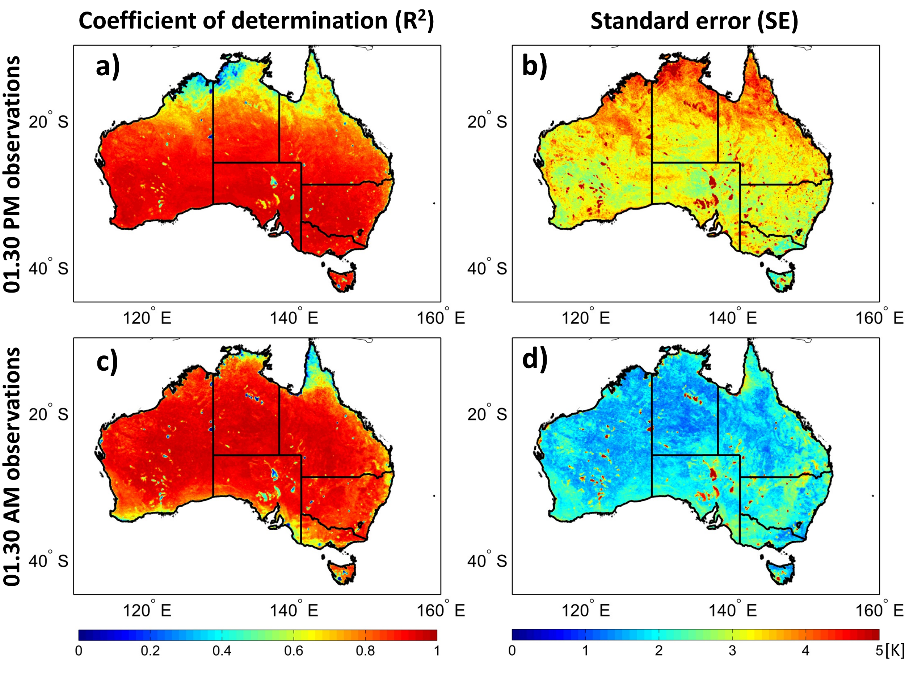


**Figure S1.** The high agreement between the raw timeseries of the Land Surface Temperature products from MODIS and AMSR2 expressed in R2 (**a**) for day time observations; SE (**b**) for day time observations; R2 (**c**) for night time observations and SE (**d**) for night time observations.


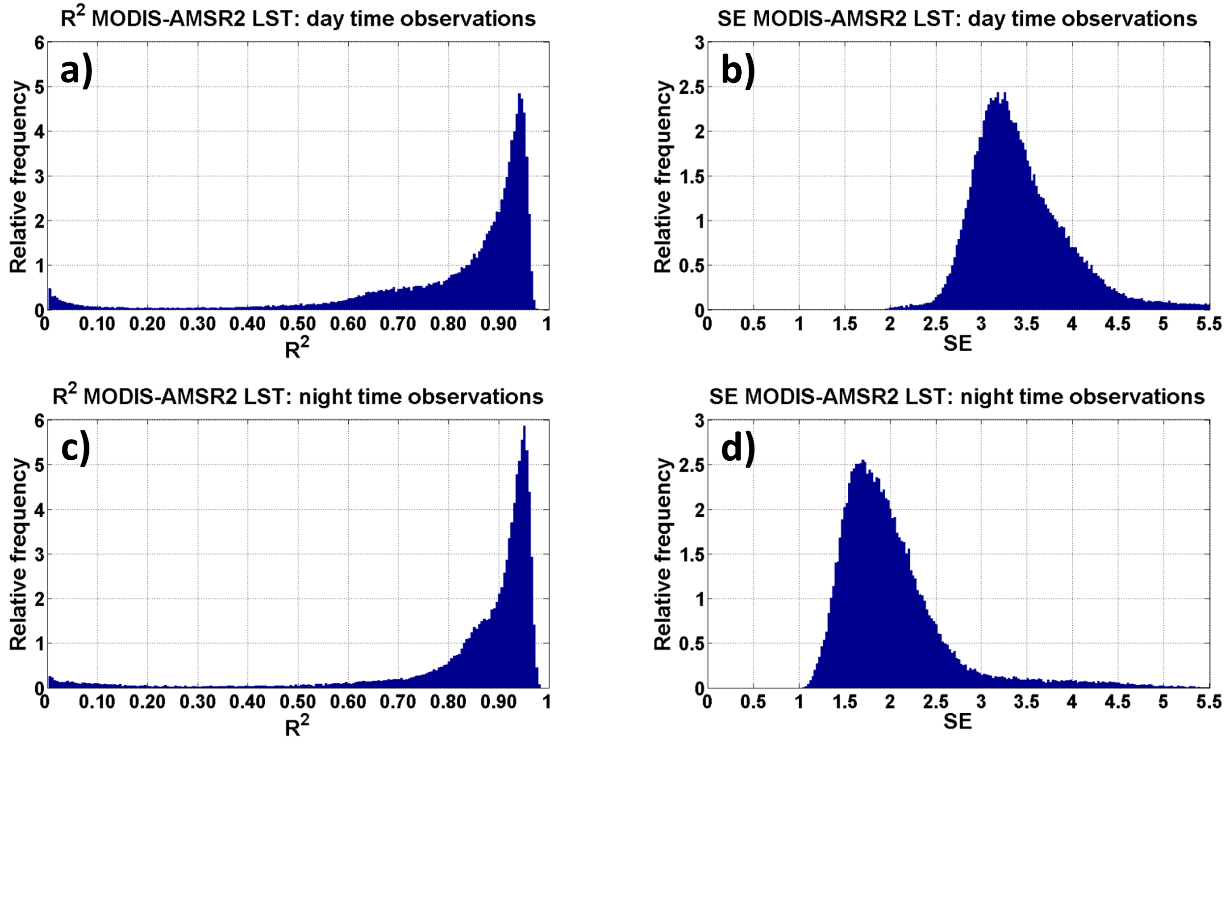


**Figure S2.** Histograms that show the agreement between the raw timeseries of the Land Surface Temperature products from MODIS and AMSR2 expressed in R2 (**a**) for day time observations; SE (**b**) for day time observations; R2 (**c**) for night time observations and SE (**d**) for night time observations.


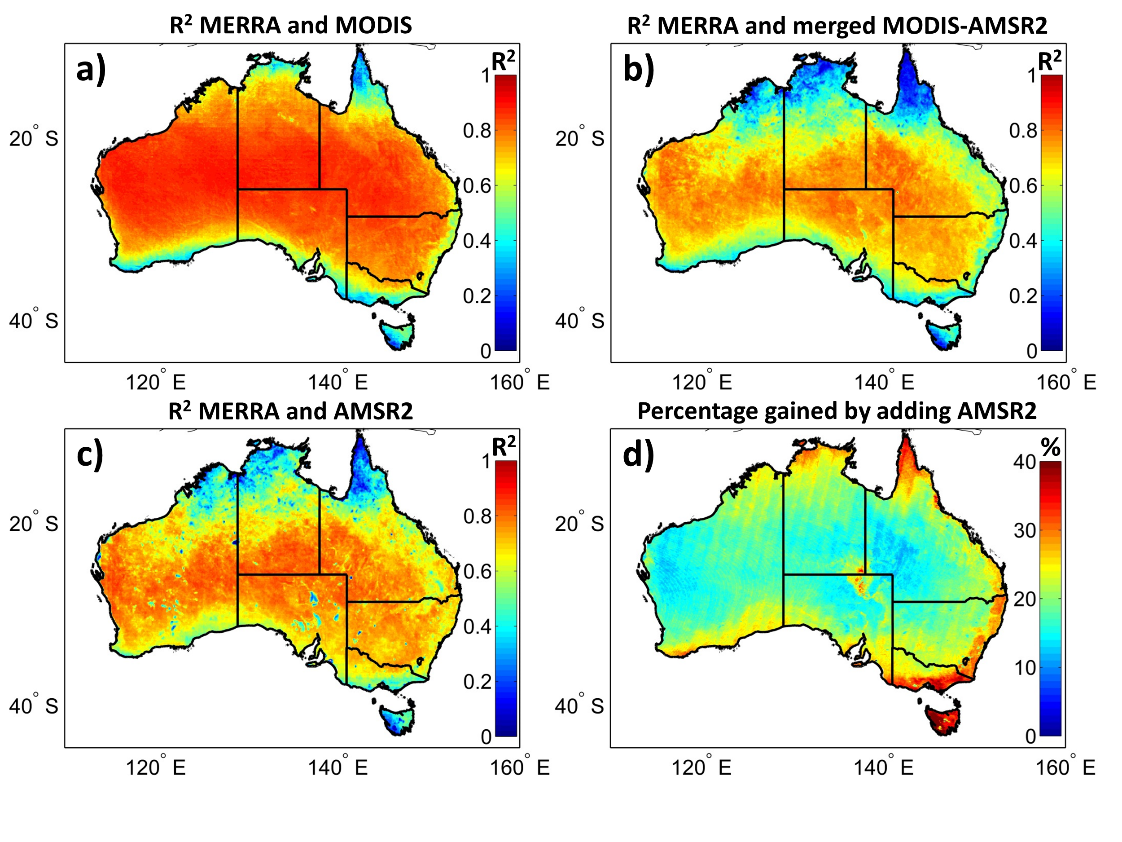


**Figure S3.** R2 between the raw timeseries from MERRA and (**a**) MODIS, (**b**) the merged MODIS-AMSR2 Land Surface Temperature product and (**c**) AMSR2, as well as the percentage of gained samples through the addition of AMSR2 observations (**d**). Note the wider range of the colorbar compared to Figure 5 that presents the results of the anomalies.


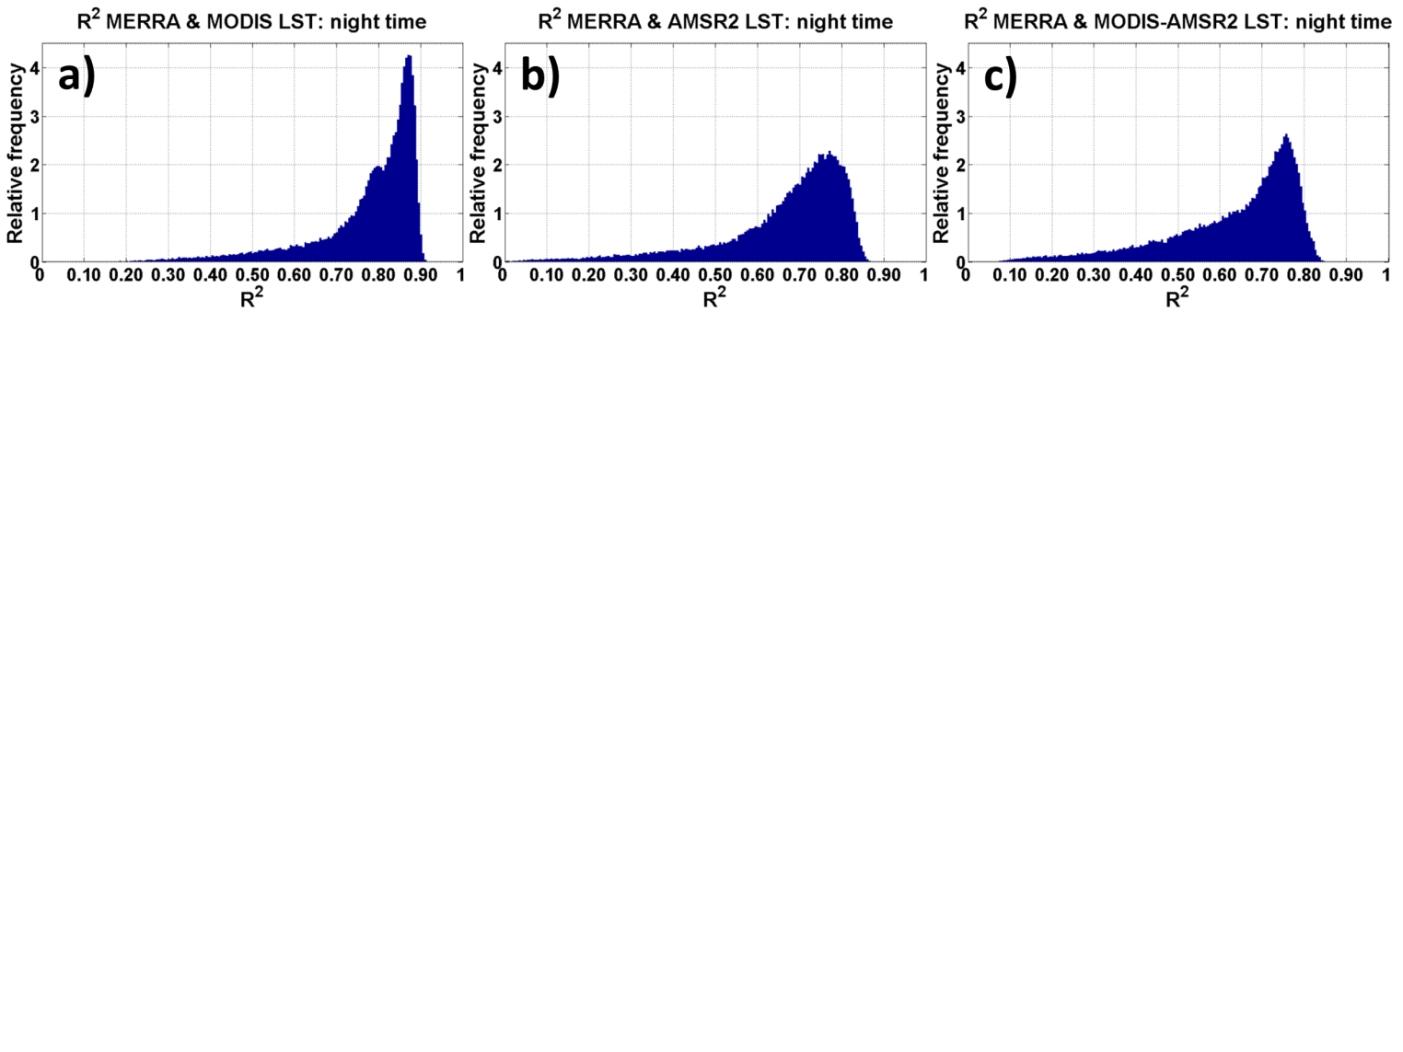


**Figure S4.** Histograms that show the agreement between the raw timeseries from MERRA Land Surface Temperature and the remotely sensed Land Surface Temperature products from MODIS (**a**); AMSR2 (**b**) and through the presented combination approach (**c**) expressed in R2.

© 2016 by the authors; licensee MDPI, Basel, Switzerland. This article is an open access article distributed under the terms and conditions of the Creative Commons by Attribution (CC-BY) license (http://creativecommons.org/licenses/by/4.0/).
